# Supplementary material for: Embedding MSCs in Si-HPMC hydrogel decreased MSC-directed host immune response and increased the regenerative potential of macrophages
Source: PubMed Central journal article supplement (PMC9245650; doi:10.1093/rb/rbac022), 2022-04-25
Supplement: rbac022_supplementary_data.pdf [file rbac022_supplementary_data.pdf]

**Supplementary Data 1.** Schematic diagram of the gating procedure for flow cytometry analyses. Hu- MSC were visualized according to SSC (granularity) and FSC (size) using BD Bioscience flow cytometer. Then, median of Phycoerythrin (PE) fluorescence was quantified on cells in singlet.

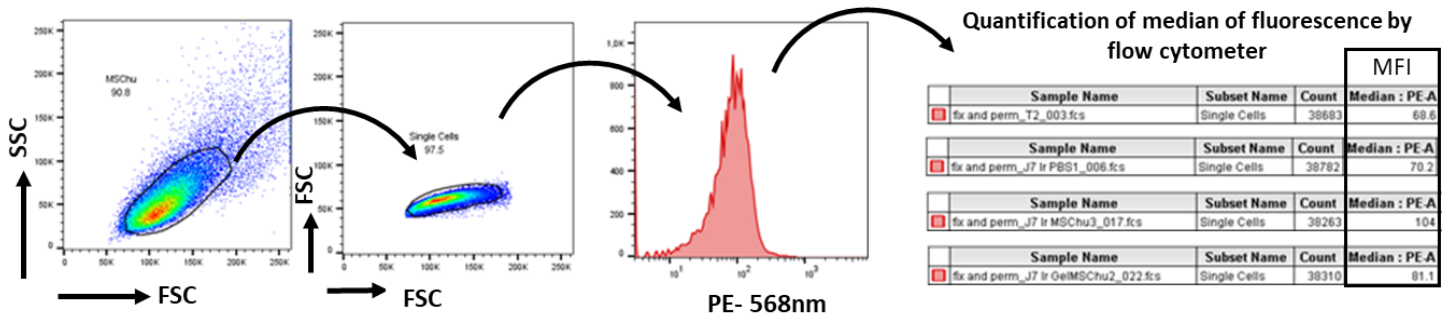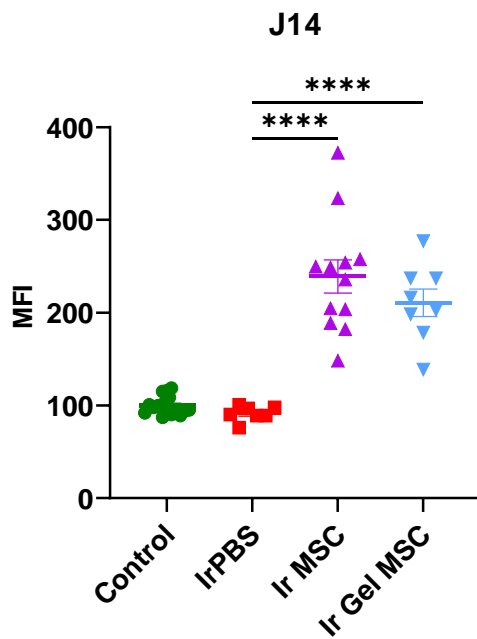

**Supplementary Data 2.** Scatter plot representing the relative quantity of antibodies in plasma detected in each group of rats 14 days after injection of hu- MSC by measuring the median fluorescence intensity detected using flow cytometry following permeabilization of the cells. Control = non-irradiated non-injected rats ( $n=16$  animals per group); Ir PBS = irradiated and PBS 1x-injected rats ( $n=7$ ); Ir MSC = irradiated and hu- MSC-injected rats ( $n=12$ ); Ir Gel MSC = irradiated and Si-HPMC embedded hu- MSC-injected rats ( $n=8$ ). Statistic \*\*\*\*  $p<0.001$ .
